# Supplementary material for: Reducing cardiac arrests in the acute admissions unit: a quality improvement journey
Source: PubMed Central journal article supplement — BMJ Qual Saf. 2013 Jul 4;22(12):1025–31. doi: 10.1136/bmjqs-2012-001404 (PMC3888590; doi:10.1136/bmjqs-2012-001404), 2013-07-04

### Appendix figure 1. U chart demonstrating monthly 2222 calls outside AAU per 1000 admissions

The balancing measure of 2222 calls per 1000 admissions to patients outside the AAU (including in critical care) did not show any shift from the initial baseline.

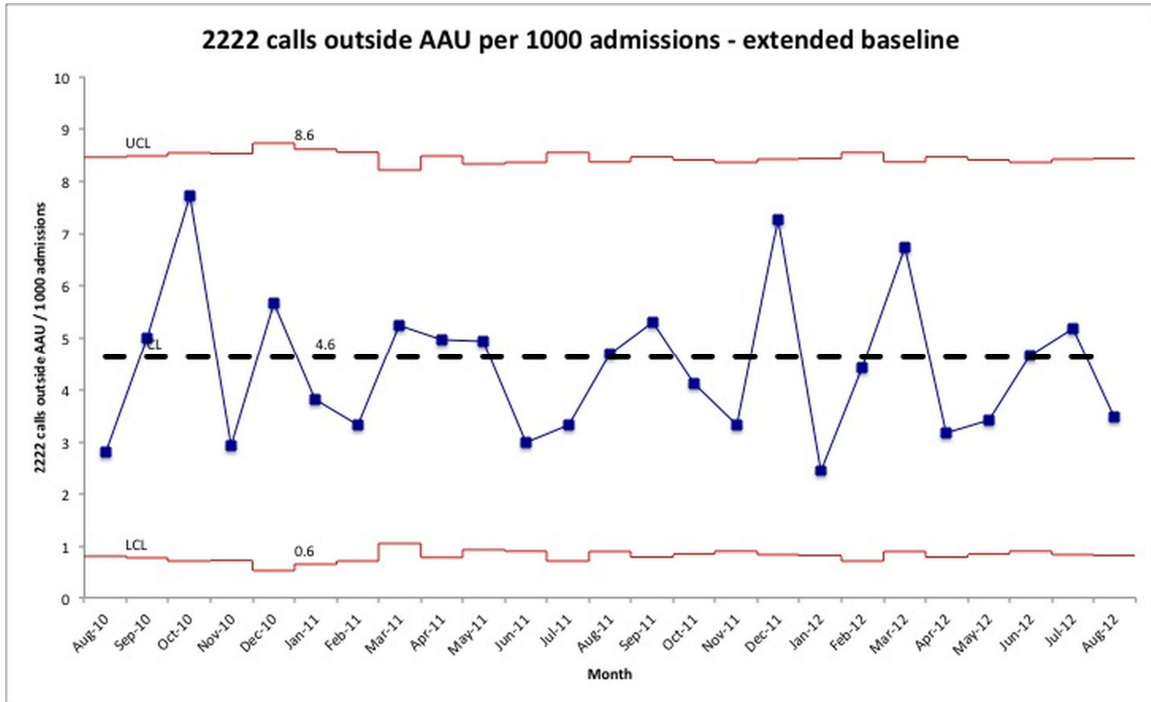

**Appendix figure 2. U chart showing monthly referral rate to the hospital oncology liaison service/palliative care service from AAU**

A significant upwards shift was noted in October 2011. Segmentation of the data following the significant shift in rate of referrals demonstrates an increase from mean of 21.9/1000 per month (baseline) to 36.8/1000 per month (October 2011-August 2012), a relative increase of 68%

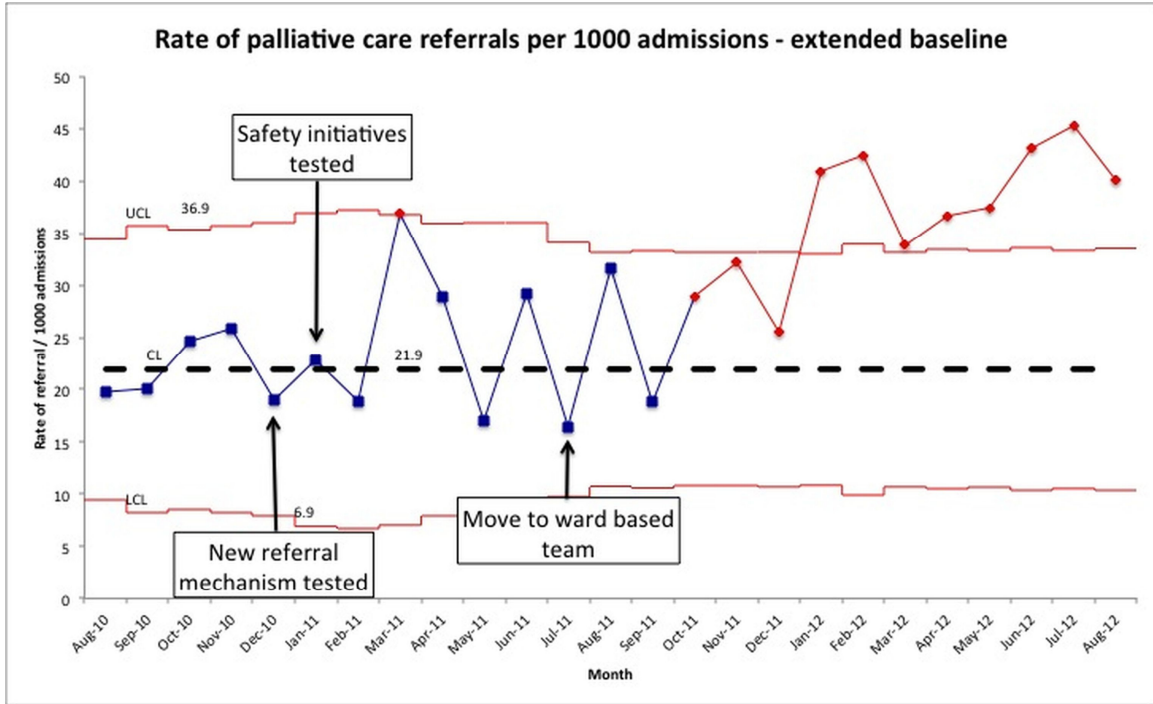

**Appendix figure 3. P chart with extended baseline showing the 30 day mortality of all patients admitted to AAU or CAU**

30-day mortality of all patients attending AAU or CAU demonstrated a significant fall, from 5.8 to 4.4%, a relative reduction of 24%

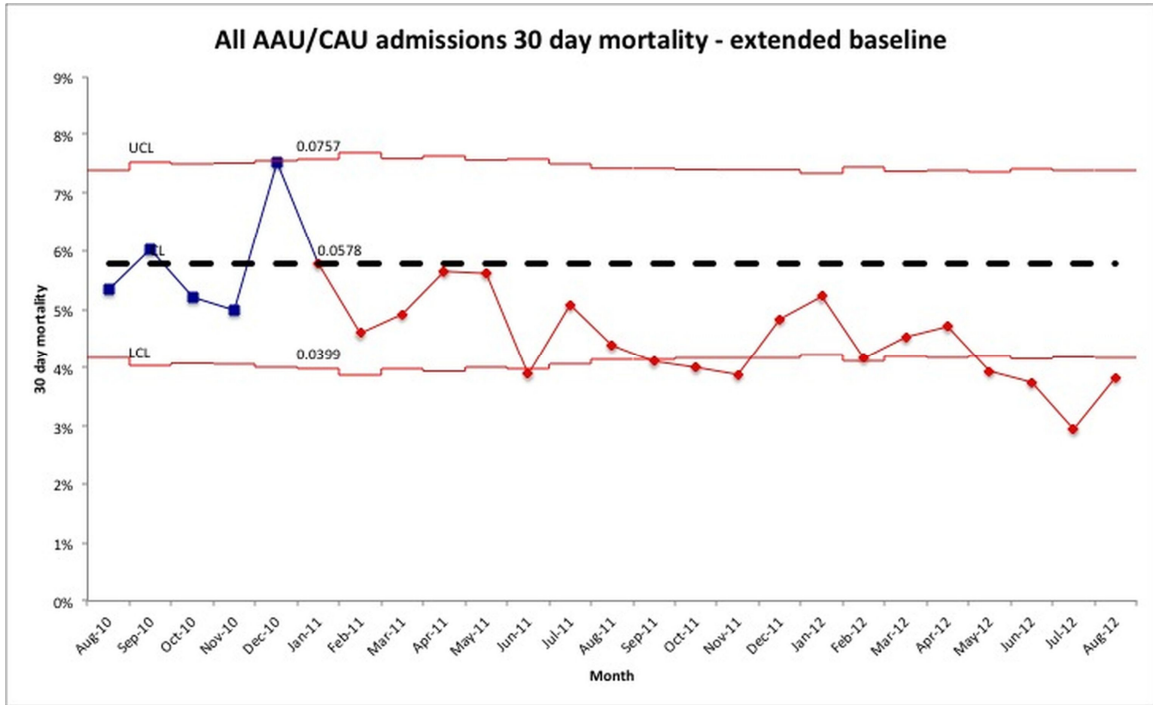

Supplement: bmjqs-2012-001404-s1.pdf [file bmjqs-2012-001404-s1.pdf]
